# Supplementary material
Source: publisher figshare collection journal article supplement (https://acs.figshare.com/ndownloader/files/26476037)
Supplement: Supplementary file 1 [file 26476037]

**Hierarchical Porous Nitrogen-Doped Carbon by Pickering  
HIPEs Technique: Synthesis and Application in HMF  
Production**

Bing Li<sup>a</sup>, Yao Chen<sup>b,\*</sup>, Wen Guan<sup>a</sup>, Yanan Wei<sup>a</sup>, Yunlei Zhang<sup>a,\*</sup>, Yongsheng Yan<sup>a</sup>

<sup>a</sup> *Institute of Green Chemistry and Chemical Technology, School of Chemistry and  
Chemical Engineering, Jiangsu University, Zhenjiang, P. R. China*

<sup>b</sup> *School of the Environment and Safety, Jiangsu University, Zhenjiang, P. R. China*

<sup>\*</sup> *Corresponding author. Email: chenyaol390@ujs.edu.cn (Y. Chen)*

*zylff035@126.com (Y. Zhang);*

*Tel: +86 511 88830099 Fax: +86 511 88830099*

## EXPERIMENTAL SECTION

**Synthesis of acid and base catalyst:** Firstly, in order to obtain water-in-oil Pickering HIPEs, we adjusted the hydrophilicity of the obtained SBA-15. The steps of grafting amino on the surface of SBA-15 were as follows: Toluene (285 mL), SBA-15 (1.9 g) and KH-550 (10 mL) were added into a three-mouth flask to disperse evenly. The reaction was placed in an oil bath at 110°C and refluxed under a nitrogen atmosphere for 12 h. The products were then collected, washed with toluene, centrifuged, and dried in a vacuum at 60 °C. The amino-grafted SBA-15(1.0 g) was suspended in the mixture of OA and chlorine (1:4 M ratio), stirred for 3.0 h, and oA-SBA-15 was extracted from the solution by methanol precipitation and dried in an oven at 60 °C.

Secondly, water in oil (W/O) Pickering HIPEs template was formed by using oleic acid modified SBA-15 particles obtained in the previous step as stabilizer. A detailed procedure for acid catalyst is as follows: OA-SBA-15 (1.5 wt% of oil phase mass), AIBN (0.06 g) and polymer 2296 (0.13 g) were dissolved in the mixture of DVB (3.0 mL) and toluene (2.0 mL) to form a continuous external phase under mild stirring. Afterwards, under continuous stirring, the inner water phase (26.7 mL deionized water) was added to the oleic phase dropwise to obtain stable W/O HIPEs. Pickering HIPEs were transferred to a sealed glass mold, polymerized in a 70 °C water bath for more than 12 h, and then washed with acetone through Soxhlet extraction for more than 48 h to remove impurities. The resultant polymer foams were dried to a constant weight in a drying oven at 60 °C. Under the condition of nitrogen atmosphere, the samples were heat-treated for 2.0 h at a heating rate of 5.0 °C min<sup>-1</sup>. The system temperature was 600 °C. The synthesis procedure of base catalyst was same as acid catalyst except for replacing DVB with a mixture of DVB (3.0 mL) and 1-vinyl imidazole (6.0 mL), the final synthesized base catalyst was named NC-700.

Finally, the acid catalyst prepared in the previous step was sulfonated. In general, acid catalyst (5.0 g) was added into 50 mL concentrated sulfuric acid (98%), protected by nitrogen for 0.5 h, and heated at 180 °C for 5.0 h. Then the sulfonated mixture was cooled to room temperature and diluted with deionized water to form a black sediment, filtered and repeatedly washed with a large amount of deionized water until the filtrate was neutral. The obtained samples were dried in a vacuum at 60°C for 48h, the final synthesized acid catalyst was named SC-700.

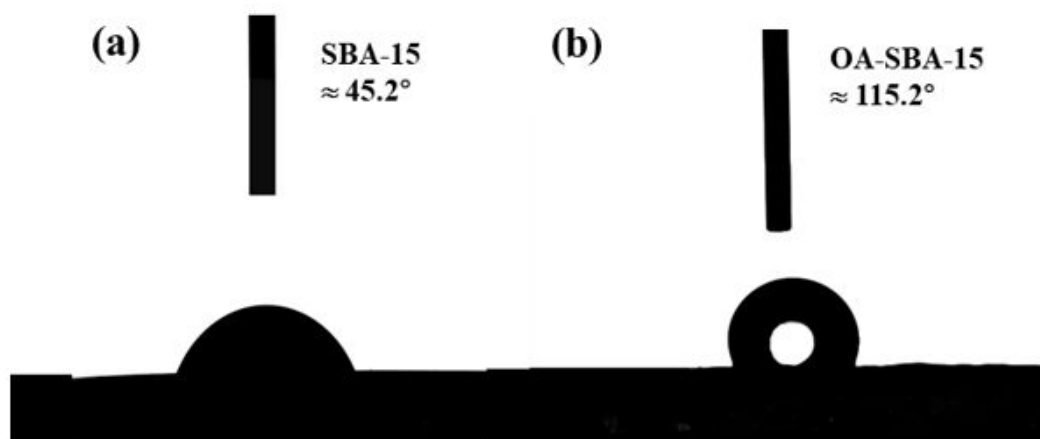

39 **Figure. S1** Water contact angles of SBA-15 and 1:4 OA-SBA-15.

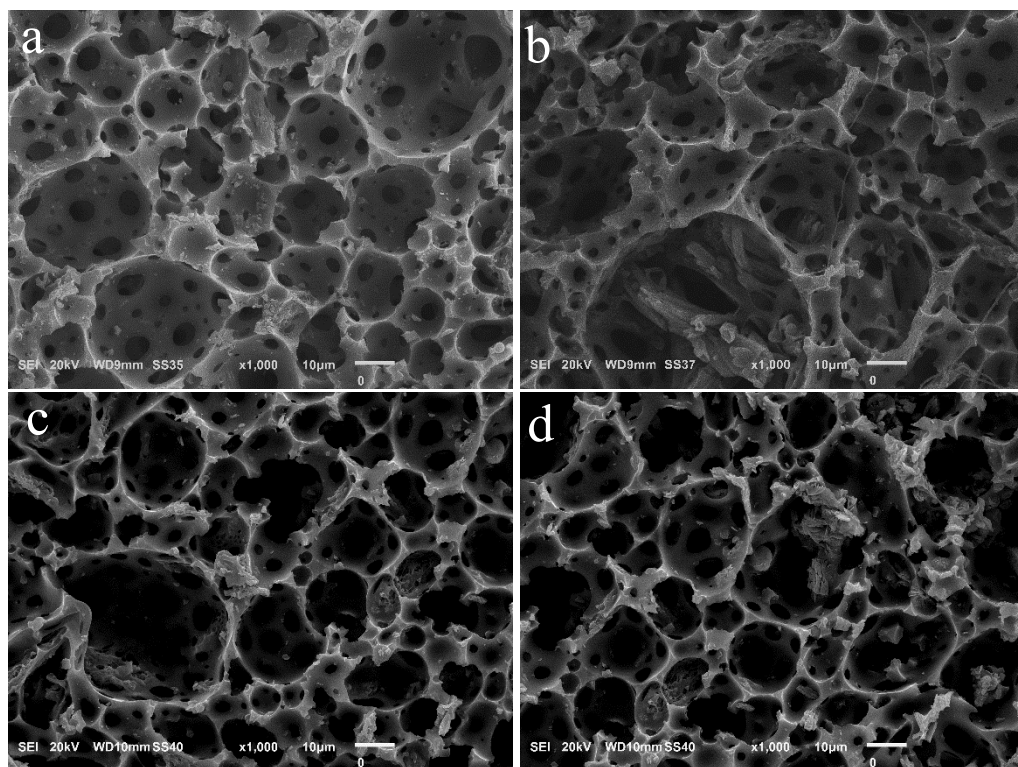

40 **Figure. S2** (a-d) SEM images of SNC2-700, SNC3-700, NC-700, SC-700.

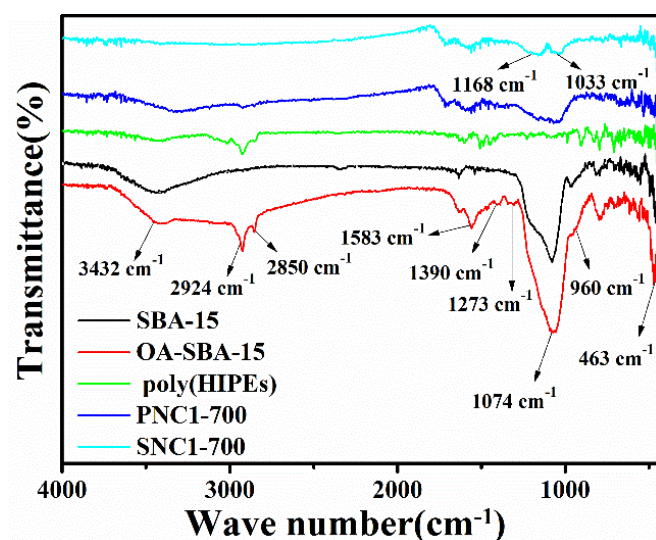

41 **Figure. S3** FT-IR spectra of SBA-15, OA-SBA-15, poly (HIPEs), PNC1-700 and SNC1-700.

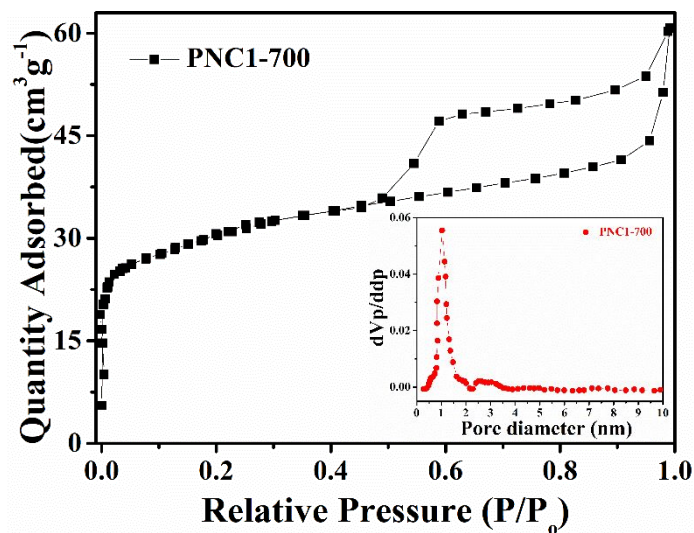

42 **Figure. S4** Nitrogen adsorption-desorption isotherms and pore size distributions of PNC1-700.

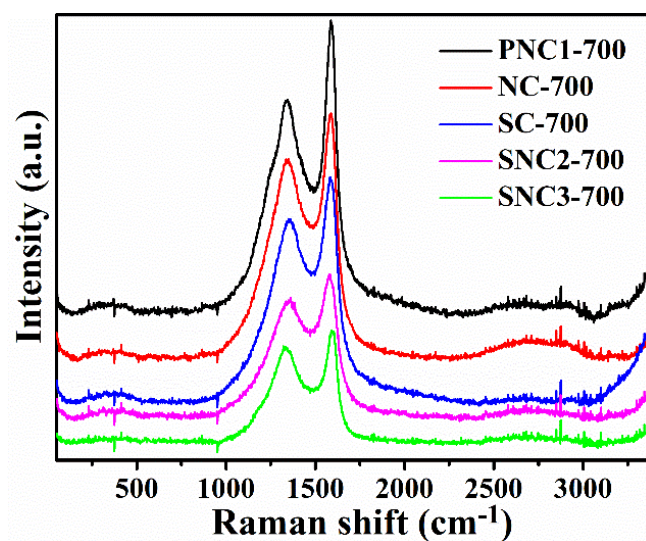

43 **Figure. S5** Raman spectra of PNC1-700, SNC2-700, SNC3-700, SC-700, NC-700 materials at  
44 different pyrolysis temperatures.

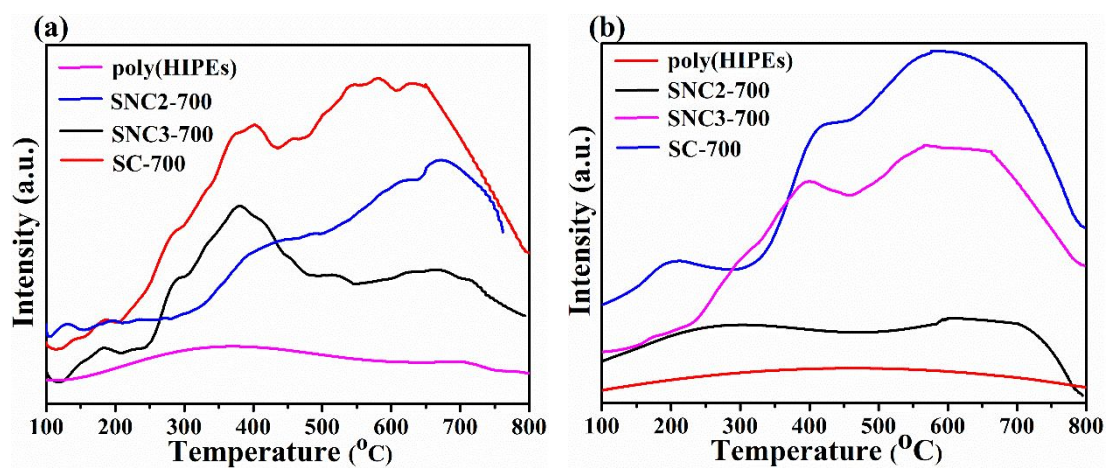

Figure. S6 CO<sub>2</sub>-TPD (a) and NH<sub>3</sub>-TPD (b) curves of catalysts.

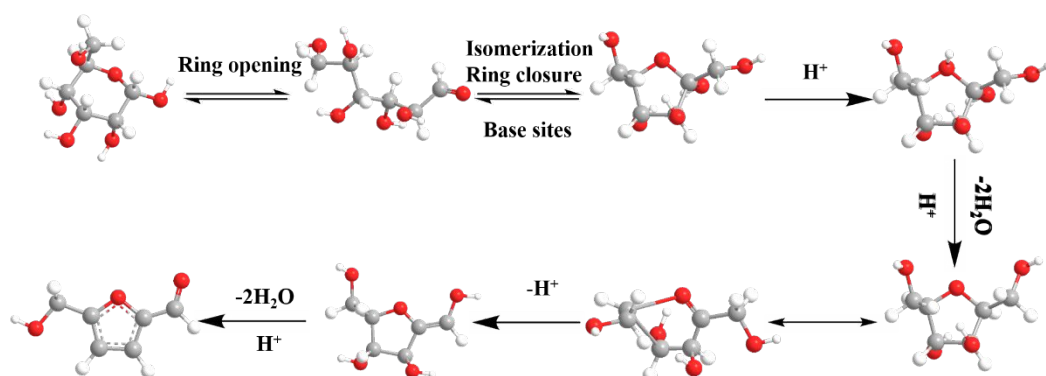

Figure. S7 The plausible catalytic scheme for the conversion of glucose into HMF over our developed acid-base bi-functional catalyst.
